# Supplementary material for: Diagnostic and Prognostic Value of Selected MicroRNAs in Patients with Acute Heart Failure
Source: Research Square preprint supplement (doi:10.21203/rs.3.rs-117036/v1), 2020-12-09
Supplement: Supplementary file 1 [file 82023325f0d34262e3d36363.docx]

**Supplementary materials**

**Title:** Diagnostic and Prognostic Value of Selected MicroRNAs in Patients with Acute Heart Failure

**Authors:** Seyyed-Reza Sadat-Ebrahimi, Naser Aslanabadi, Milad Asadi, Venus Zafari, Dariush Shanebandi, Habib Zarredar, Elgar Enamzadeh, Hamed Taghizadeh, Reza Badalzadeh


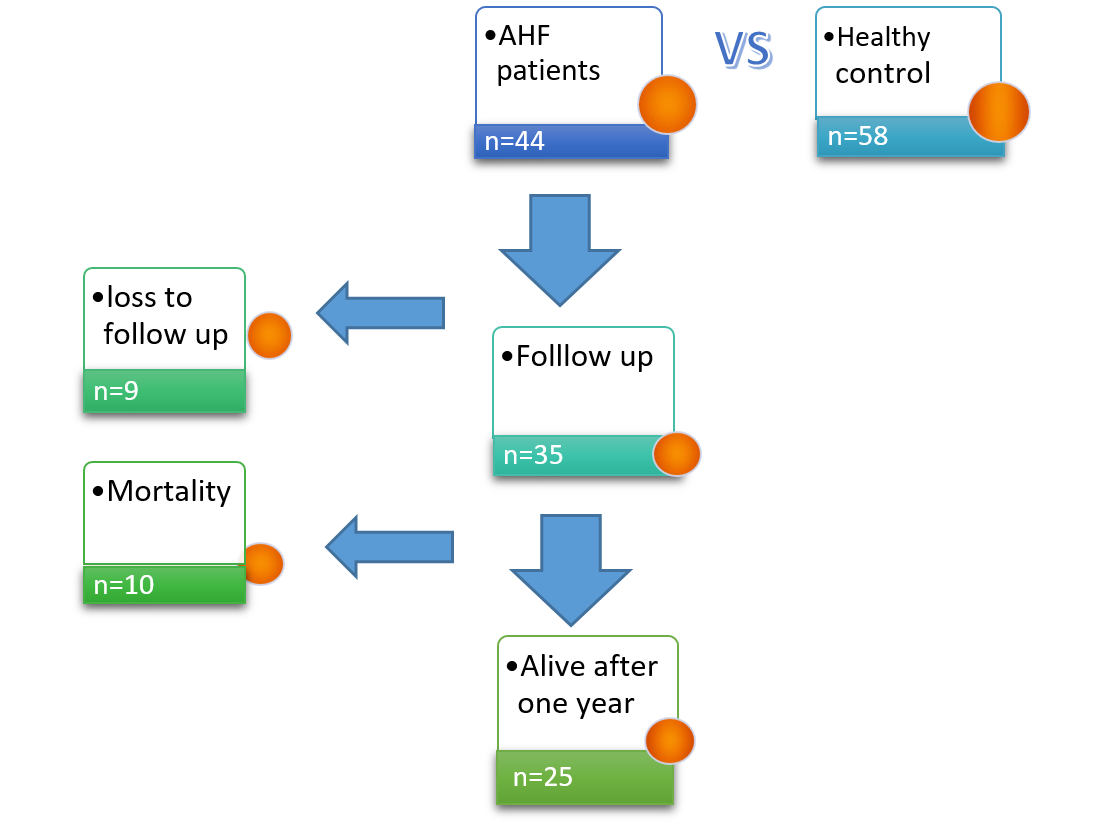
Supplementary figure 1. Inclusion of patients and follow up


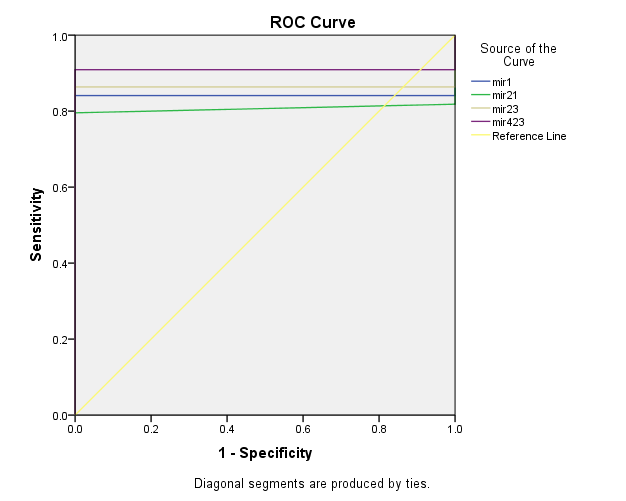


Supplementary figure 2. ROC curve plotted for four selected miRNAs
